# Supplementary material
Source: PubMed Central journal article supplement (PMC3577999)
Supplement: NIHMS431624-supplement-10519_2012_9579_MOESM1_ESM.pdf [file NIHMS431624-supplement-10519_2012_9579_MOESM1_ESM.pdf]

## Behavior Genetics

### Comparison of Whole-Genome DNA Methylation Patterns in Whole Blood, Saliva, and Lymphoblastoid Cell Lines

Thompson TM, Sharfi D, Lee M, Yrigollen CM, Naumova OY, Grigorenko EL\*

\* Child Study Center, Department of Psychology, Department of Epidemiology & Public Health, Yale University, [elena.grigorenko@yale.edu](mailto:elena.grigorenko@yale.edu)

**Table S1.** Intra-individual correlations between whole genome methylation profiles for DNA derived from blood (WB), saliva (SL) and lymphoblastoid cell lines (LCLs).

| Individual # | WB vs. SL              | WB vs. LCLs            | SL vs. LCLs            |
|--------------|------------------------|------------------------|------------------------|
| b804         | 0.9576                 | 0.8660                 | 0.8354                 |
| 1023         | 0.9790                 | 0.7585                 | 0.7515                 |
| 1026         | 0.9738                 | 0.7956                 | 0.7747                 |
| 1078         | 0.9728                 | 0.8659                 | 0.8354                 |
| 1164         | 0.9643                 | 0.9072                 | 0.8709                 |
| 1171         | 0.9724                 | 0.8148                 | 0.7735                 |
| 1311         | 0.9254                 | 0.8247                 | 0.7001                 |
| 1359         | 0.9671                 | 0.7547                 | 0.7164                 |
| 1405         | 0.9778                 | 0.9298                 | 0.9006                 |
| 1430         | 0.9760                 | 0.9101                 | 0.8697                 |
| 1434         | 0.9489                 | 0.8754                 | 0.8754                 |
| 1435         | 0.9514                 | 0.9254                 | 0.8762                 |
| 1437         | 0.9597                 | 0.8125                 | 0.7774                 |
| 1481         | 0.8960                 | 0.8855                 | 0.8076                 |
| <b>Mean</b>  | <b>0.9587 ± 0.0070</b> | <b>0.8519 ± 0.0450</b> | <b>0.8118 ± 0.0533</b> |
